# Supplementary material
Source: PubMed Central journal article supplement (PMC6483505)

## SUPPLEMENTAL DATA

Najjar, Menk et al. 2019

**Figure S1. GEMM-derived Clone 24 murine melanoma has poor immune infiltration and is resistant to PD-1 blockade therapy.** (A) Schematic of Clone 24 murine melanoma cell line generation.

(B) Representative OCR vs ECAR of MelanA (B6 melanocyte cell line) and Clone 24 (left) and tabulated baseline OCR and ECAR (right) from multiple experiments. (C) Representative flow cytogram (left) and tabulated data from multiple experiments (right) of CD8 and CD4<sup>+</sup> T cells from Clone 24 and B16-bearing mice. LN, lymph node, TIL, tumor infiltrating lymphocytes. (n=3 per group) (D) Tumor growth curves of C57/BL6 inoculated with 250,000 Clone 24 melanoma cells intradermally. Mice received 200 µg anti-PD1 or isotype controls thrice weekly when palpable tumors were detected (typically day 5 or 6) (n=4 per group). Each line represents one animal. Data represent 3 independent experiments. \* p <0.05, \*\* p <0.01, ns not significant by unpaired t-test. Error bars indicate s.e.m.

**Figure S2. RNA interference to metabolic genes represses target proteins and does not impair tumor cell proliferation.** (A) Representative immunoblot (left) and tabulated densitometry (right) of

Glut1 and Ndufs4 from Clone 24 melanoma cells transfected with either scrambled control, *Slc2a1* (Glut1), or *Ndufs4* (complex I) shRNA. (B) Tabulated OCR and ECAR from multiple experiments of Clone 24 melanoma cells transfected with either scrambled control, *Slc2a1* (Glut1), or *Ndufs4* (complex I) shRNA. (C) *In vitro* proliferation of Clone 24 cells as in A. Data represent 3 independent experiments.

\* p <0.05, \*\* p <0.01, ns not significant by unpaired t-test. Error bars indicate s.e.m.

**Figure S3.** (A) Representative flow cytogram of IFN $\gamma$  and TNF $\alpha$  from patients as in Figure 4B-4D. (B) Representative flow cytogram of MitotrackerFM and 2NBDG of CD8<sup>+</sup> T cells from patients as in Figure 4E.

# Figure S1

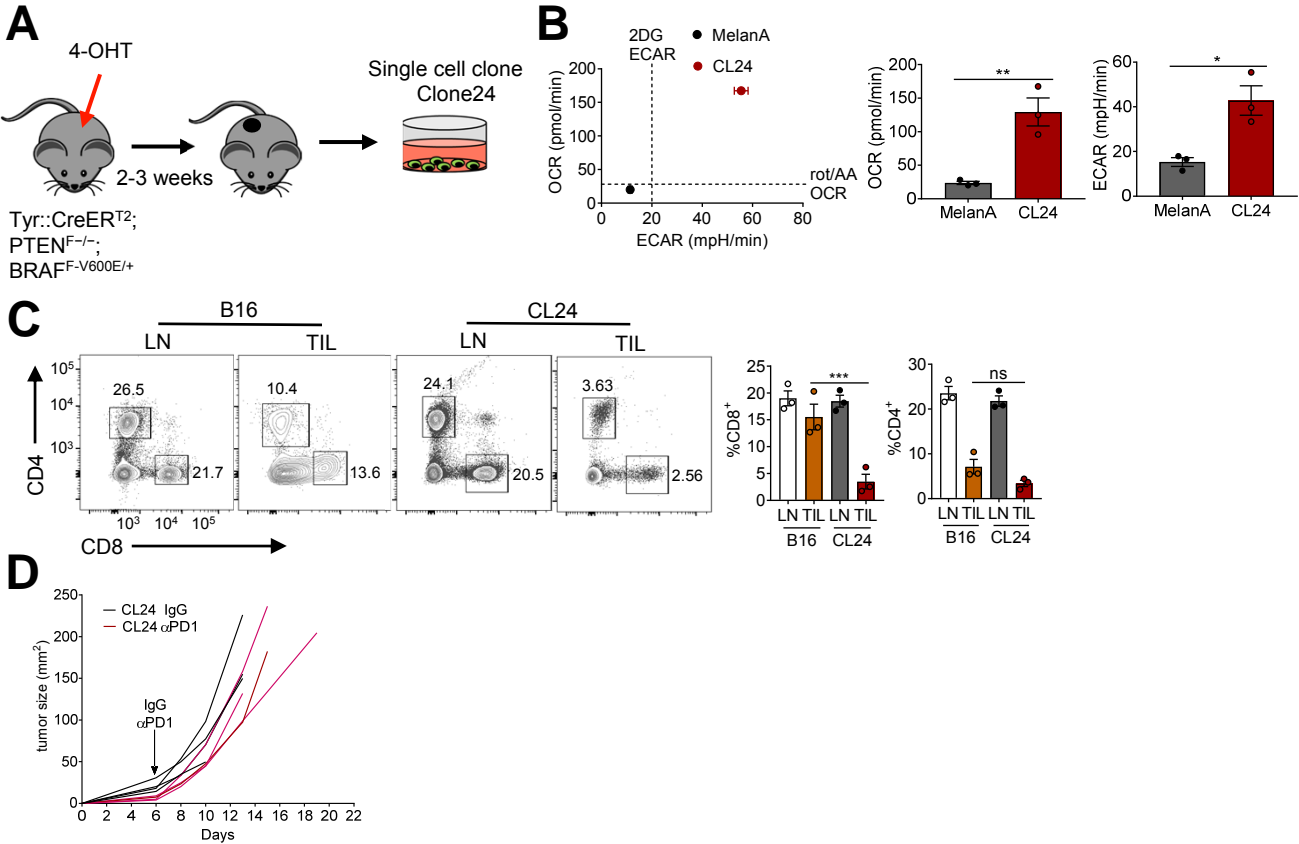

# Figure S2

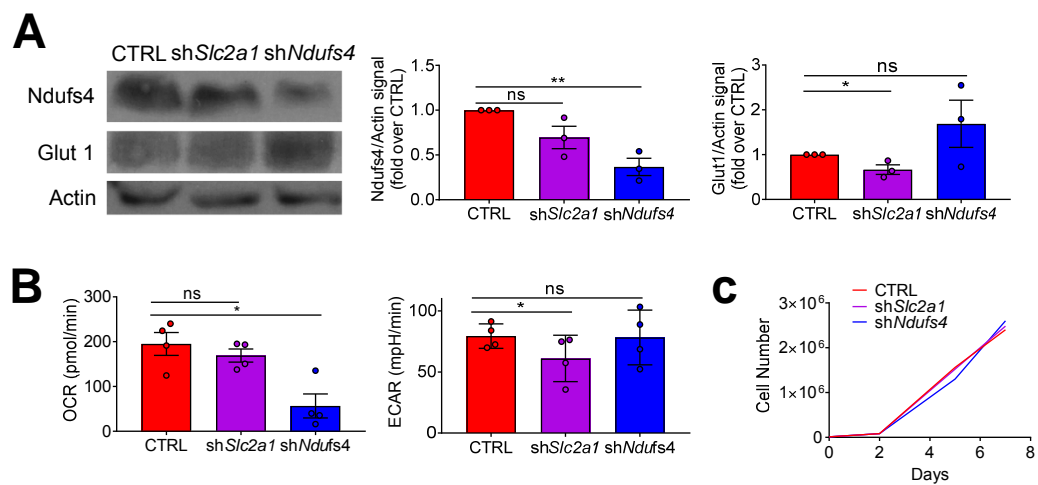

# Figure S3

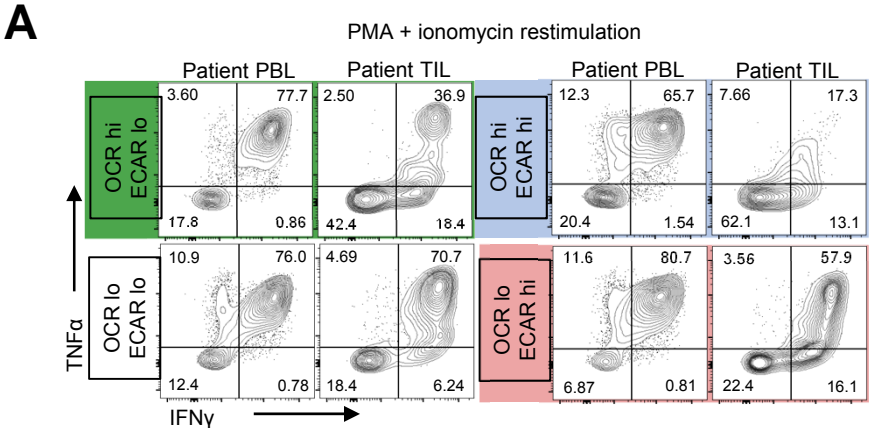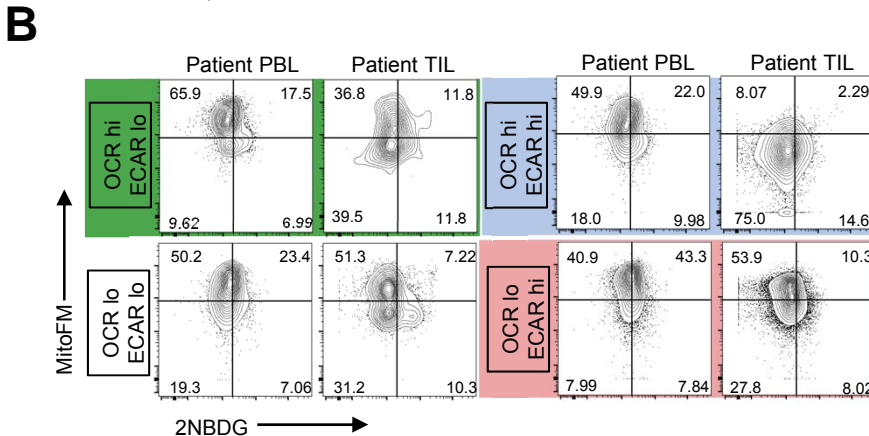

Supplement: jciinsight-4-124989-s105.pdf [file jciinsight-4-124989-s105.pdf]
